# Supplementary material for: Genome-wide characterization and expression analysis of the heat shock transcription factor family in pumpkin (Cucurbita moschata)
Source: Research Square preprint supplement (doi:10.21203/rs.3.rs-38574/v5), 2020-10-06
Supplement: Supplementary file 1 [file 3ac8da4f5718391e5af9f11f.xlsx]

## Sheet: Table S2
Table S2 Statistics for the number of cis-acting elements in the 36 CmHsf gene promoters.
Gene name	Putative cis-acting elements
	salicylic acid responsiveness	defense and stress responsiveness	low-temperature responsiveness	abscisic acid responsiveness	gibberellin-responsiveness	MeJA-responsiveness	auxin responsiveness	drought-inducibility	wound-responsive element
CmHsf1	3	1	1	4	3
CmHsf2		1		2		4	2
CmHsf3				2	1	4
CmHsf4	2			2	1	4	1
CmHsf5	2				1	6	1	1
CmHsf6	3	1		2	2	4	1	1
CmHsf7		1		6	1	4	1
CmHsf8	1			3				1
CmHsf9	1			5	2	8	2
CmHsf10	2				2	4	1
CmHsf11	1		1	10	1	4	3
CmHsf12			1	1		4	1	1
CmHsf13			1	8		2		1
CmHsf14	2	2		2		2	2
CmHsf15				3			1
CmHsf16	1	1	1	2		6	3	2
CmHsf17	2			6	1	8	2	3
CmHsf18	1	1		1	3	4	3
CmHsf19	1			5	2	4		1	1
CmHsf20	3		1	1	1	4	3
CmHsf21				1	2
CmHsf22	5	1	1	5	2	2		1
CmHsf23		1	3		1			2
CmHsf24				5		2	1
CmHsf25				7	2	6		1
CmHsf26			2	6		8	1
CmHsf27				12	2	2	1	3
CmHsf28				2		2
CmHsf29				10	1	2	1
CmHsf30		1		5			4
CmHsf31	2	1	2	1	1	4	1
CmHsf32	1			5			3	1
CmHsf33			2	3	1	2	2	2
CmHsf34			2	12			1
CmHsf35	1		3			8	2
CmHsf36	1		1	2	1	2	1	2
Note: The promoter sequences (2 kb before the start codon) of all CmHsf genes were extracted from the Cucurbit genome database (http://cucurbitgenomics.org/), and we predicted the promoter cis-acting elements of CmHsfs by using PlantCare program (http://bioinformatics.psb.ugent.be/webtools/plantcare/html/) and visualized by Simple BioSequence Viewer in TBtools.
